# Supplementary material for: A reduced electrophilicity for simple Lewis acids A involved in non-covalent interactions with Lewis bases B
Source: Royal Society of Chemistry journal article supplement (doi:10.1039/d2cp00779g), 2022-01-01
Supplement: d2cp00779g1.pdf [file d2cp00779g1.pdf]

## Supplementary Material

### A reduced electrophilicity for simple Lewis acids A involved in non-covalent interactions with Lewis bases B

Ibon Alkorta and Anthony Legon

#### Index

- Pg. S2      Figure S1. Dissociation energy  $D_e$  plotted against the nucleophilicity of the Lewis base B for the four series of coinage-metal-bonded complexes  $B \cdots CuX$  ( $X = F, Cl, Br, I$ ).
- Pg. S3      Figure S2.  $D_e/\sigma_{\max}$  plotted against the nucleophilicity  $N_B$  of the Lewis base B for the four series of coinage-metal-bonded -bonded complexes-  $B \cdots CuX$  ( $X = F, Cl, Br, I$ ).
- Pg. S4      Figure S3. Dissociation energy  $D_e$  plotted against the nucleophilicity of the Lewis base B for the four series of coinage-metal-bonded complexes  $B \cdots AgX$  ( $X = F, Cl, Br, I$ ).
- Pg. S5.      Figure S4.  $D_e/\sigma_{\max}$  plotted against the nucleophilicity  $N_B$  of the Lewis base B for the four series of coinage-metal-bonded -bonded complexes-  $B \cdots AgX$  ( $X = F, Cl, Br, I$ ).
- Pg. S6-26    Cartesian Coordinates ( $\text{\AA}$ ) of the calculated complexes

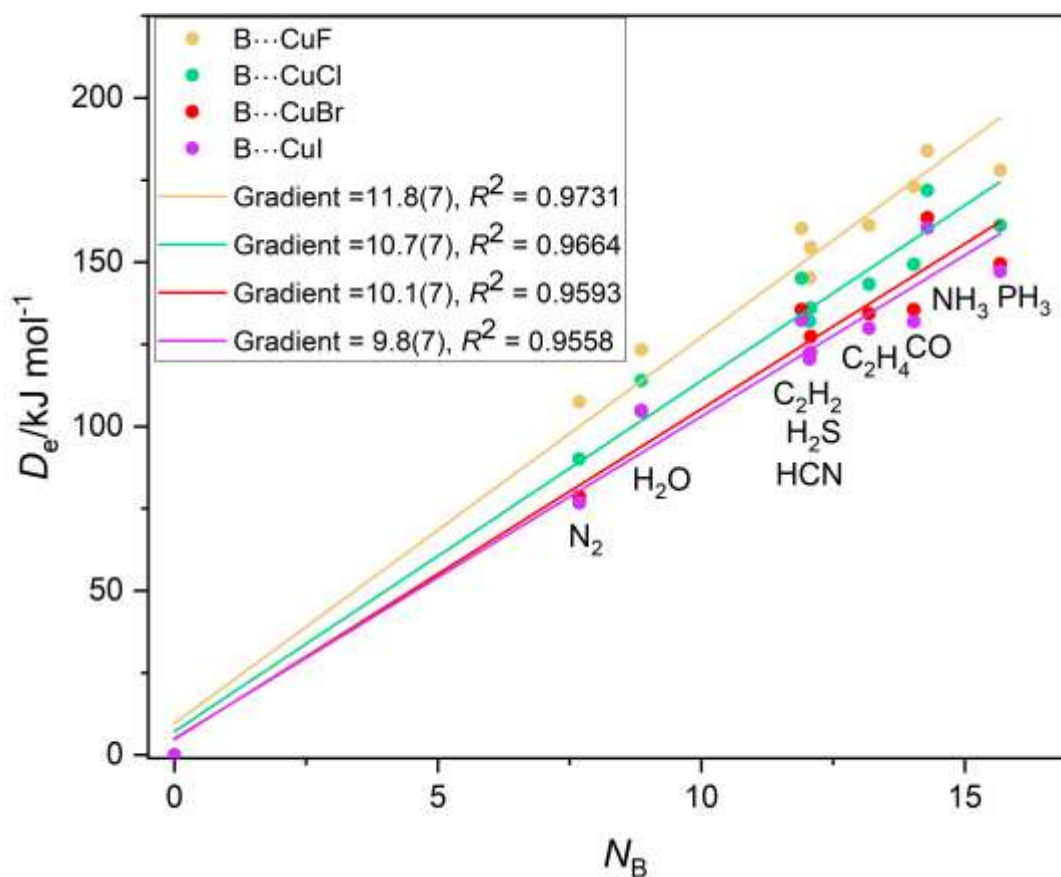

Figure S1. Dissociation energy  $D_e$  plotted against the nucleophilicity of the Lewis base B for the four series of coinage-metal-bonded complexes  $B \cdots \text{CuX}$  ( $X = \text{F}, \text{Cl}, \text{Br}, \text{I}$ ). The straight lines are linear regression fits to the points (solid dots) for each series, with the origin taken as a point. The inset gives the gradient of each fitted line in  $\text{kJ mol}^{-1}$  and the quality of the fit as measured by  $R^2$ .

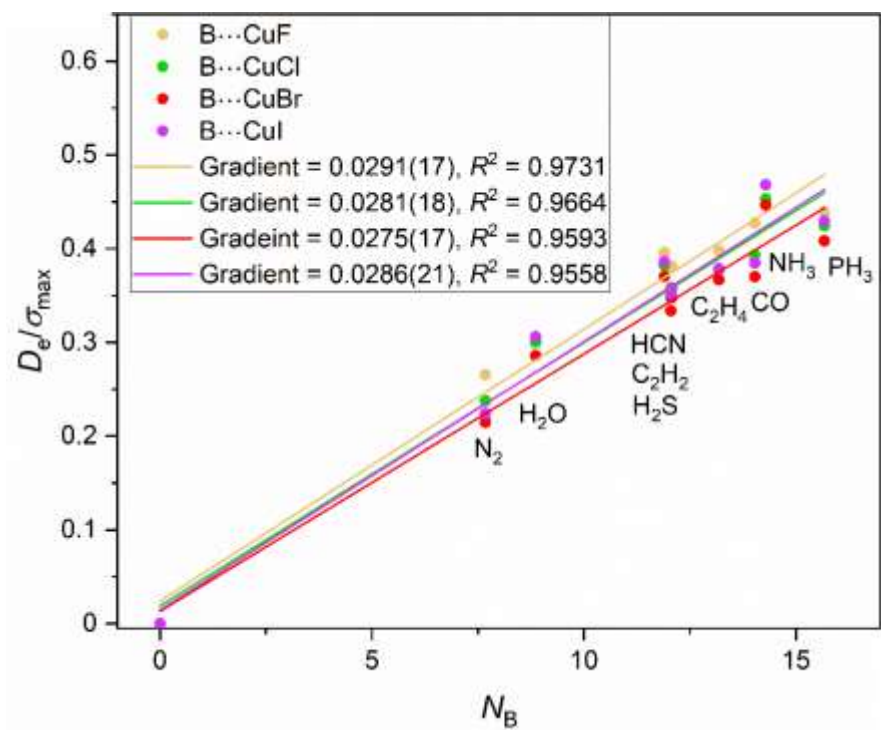

Figure S2.  $D_e/\sigma_{\max}$  plotted against the nucleophilicity  $N_B$  of the Lewis base B for the four series of coinage-metal-bonded - bonded complexes-  $B \cdots CuX$  ( $X = F, Cl, Br, I$ ). The straight lines are linear regression fits to the points (solid dots) for each series, (origin as a point). The inset gives the gradient of each fit and the quality of the fit, as measured by  $R^2$

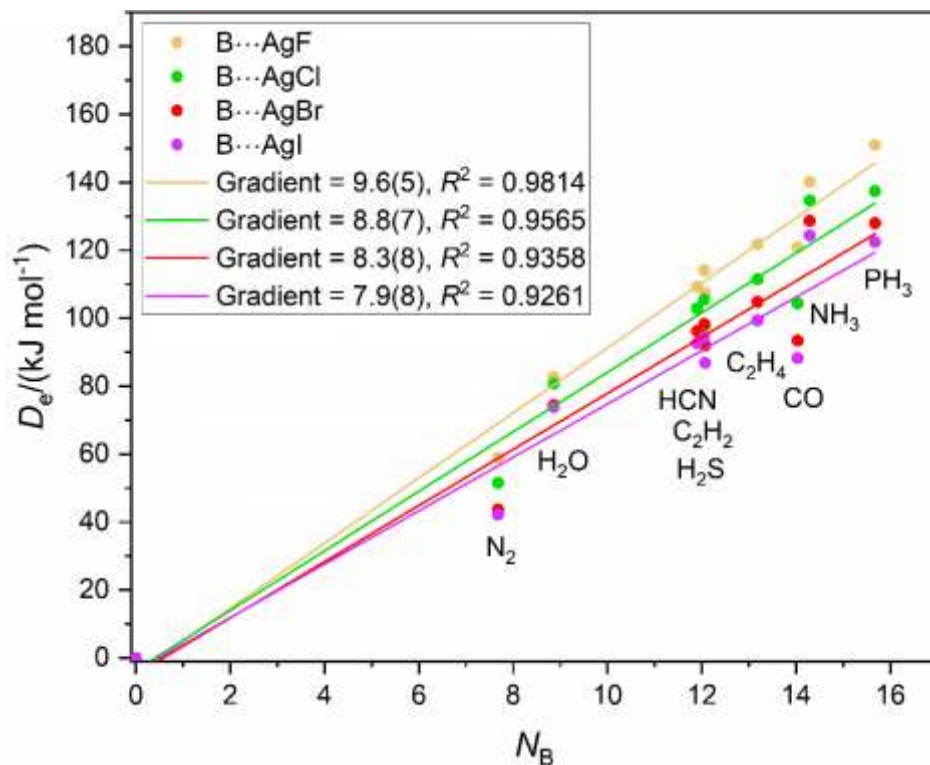

Figure S3. Dissociation energy  $D_e$  plotted against the nucleophilicity of the Lewis base B for the four series of coinage-metal-bonded complexes  $\text{B}\cdots\text{AgX}$  ( $X = \text{F}, \text{Cl}, \text{Br}, \text{I}$ ). The straight lines are linear regression fits to the points (solid dots) for each series, with the origin taken as a point. The inset gives the gradient of each fitted line in  $\text{kJ mol}^{-1}$  and the quality of the fit as measured by  $R^2$

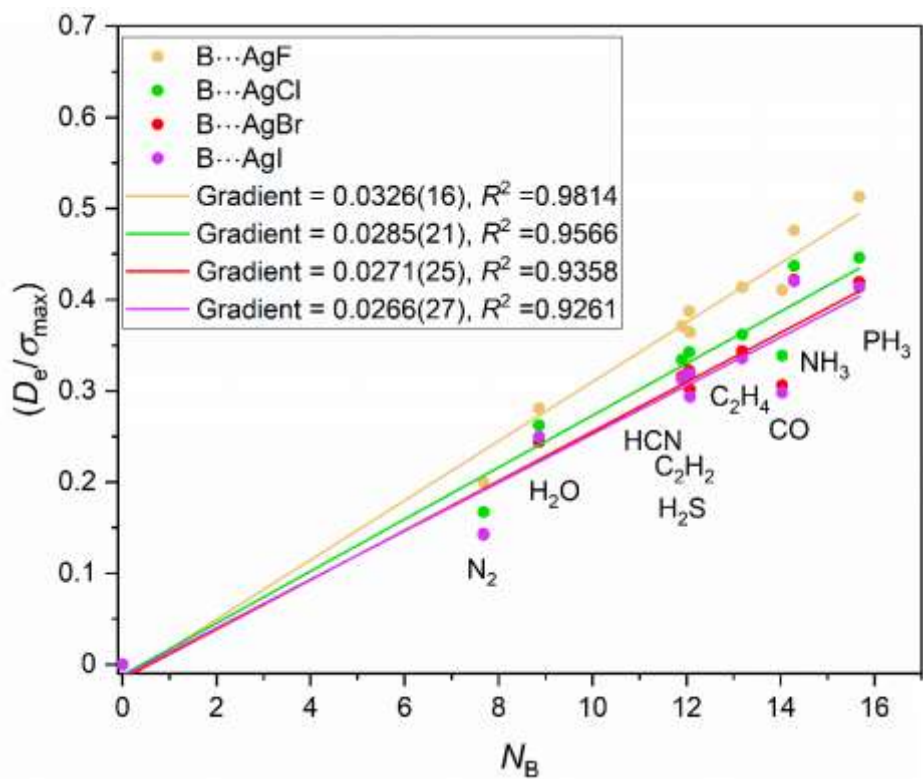

Figure S4.  $D_e/\sigma_{\max}$  plotted against the nucleophilicity  $N_B$  of the Lewis base B for the four series of coinage-metal-bonded - bonded complexes-  $B \cdots AgX$  ( $X = F, Cl, Br, I$ ). The straight lines are linear regression fits to the points (solid dots) for each series, (origin as a point). The inset gives the gradient of each fit and the quality of the fit, as measured by  $R^2$

Cartesian Coordinates (Å) of the calculated complexes

### Complexes B...IF.

|         |                                                                                                                                                                                                                                                                                                                                                                                                                  |
|---------|------------------------------------------------------------------------------------------------------------------------------------------------------------------------------------------------------------------------------------------------------------------------------------------------------------------------------------------------------------------------------------------------------------------|
| FI      | CCSD(T)-F12C/USERDEF ENERGY=-394.56734930<br>F 0.0000000000 0.0000000000 -1.6592880148<br>I 0.0000000000 0.0000000000 0.2484041057                                                                                                                                                                                                                                                                               |
| FI:CO   | CCSD(T)-F12C/USERDEF ENERGY=-507.76449772<br>F 0.0000000000 0.0000000000 -2.2398084787<br>I 0.0000000000 0.0000000000 -0.3072618601<br>C 0.0000000000 0.0000000000 2.2676637652<br>O 0.0000000000 0.0000000000 3.3944437854                                                                                                                                                                                      |
| FI:C2H4 | CCSD(T)-F12C/USERDEF ENERGY=-473.04113832<br>F 0.0000000000 0.0000000000 -2.1724490968<br>I 0.0000000000 0.0000000000 -0.2283475498<br>C 0.0000000000 0.6735257200 2.5006689845<br>C 0.0000000000 -0.6735257200 2.5006689845<br>H -0.9241437091 1.2352446494 2.5250833968<br>H 0.9241437091 1.2352446494 2.5250833968<br>H 0.9241437091 -1.2352446494 2.5250833968<br>H -0.9241437091 -1.2352446494 2.5250833968 |
| FI:C2H2 | CCSD(T)-F12C/USERDEF ENERGY=-471.78555091<br>F 0.0000000000 0.0000000000 -2.1531579163<br>I 0.0000000000 0.0000000000 -0.2245632941<br>C 0.0000000000 0.6047562977 2.6629166915<br>C 0.0000000000 -0.6047562977 2.6629166915<br>H 0.0000000000 1.6690106802 2.6967238697<br>H 0.0000000000 -1.6690106802 2.6967238697                                                                                            |
| FI:N2   | CCSD(T)-F12C/USERDEF ENERGY=-503.97647441<br>F 0.0000000000 0.0000000000 -2.2660363659<br>I 0.0000000000 0.0000000000 -0.3535611928<br>N 0.0000000000 0.0000000000 2.5893048698<br>N 0.0000000000 0.0000000000 3.6876837637                                                                                                                                                                                      |
| FI:NCH  | CCSD(T)-F12C/USERDEF ENERGY=-487.88177762<br>F 0.0000000000 0.0000000000 -2.2219929240<br>I 0.0000000000 0.0000000000 -0.2909821704<br>N 0.0000000000 0.0000000000 2.3339873752<br>C 0.0000000000 0.0000000000 3.4852217937<br>H 0.0000000000 0.0000000000 4.5529156745                                                                                                                                          |
| FI:NH3  | CCSD(T)-F12C/USERDEF ENERGY=-451.08676465<br>F -0.0000000000 0.0000000000 -1.9970754149<br>I -0.0000000000 0.0000000000 -0.0387945876<br>N 0.0000000000 0.0000000000 2.4530195286<br>H 0.9460699354 0.0000000000 2.8129245718<br>H -0.4730349677 0.8193205978 2.8129245718<br>H -0.4730349677 -0.8193205978 2.8129245718                                                                                         |
| FI:OH2  | CCSD(T)-F12C/USERDEF ENERGY=-470.94155852<br>F 2.0870802761 0.0356997936 0.0000000000<br>I 0.1598563806 -0.0065557808 0.0000000000<br>O -2.4648911009 -0.0605866747 0.0000000000                                                                                                                                                                                                                                 |

|        |                                           |               |               |               |
|--------|-------------------------------------------|---------------|---------------|---------------|
|        | H                                         | -2.8400124628 | 0.3836338960  | 0.7640582388  |
|        | H                                         | -2.8400124628 | 0.3836338960  | -0.7640582388 |
| FI:PH3 | CCSD(T)-F12C/USERDEF ENERGY=-737.29227299 |               |               |               |
|        | F                                         | -0.0000000000 | 0.0000000000  | -2.2915598743 |
|        | I                                         | -0.0000000000 | 0.0000000000  | -0.3125733158 |
|        | P                                         | 0.0000000000  | 0.0000000000  | 2.3872982868  |
|        | H                                         | 1.2310659779  | 0.0000000000  | 3.0622244320  |
|        | H                                         | -0.6155329889 | 1.0661344106  | 3.0622244320  |
|        | H                                         | -0.6155329889 | -1.0661344106 | 3.0622244320  |
| FI:SH2 | CCSD(T)-F12C/USERDEF ENERGY=-793.53204558 |               |               |               |
|        | F                                         | 2.4133457948  | 0.0366058959  | 0.0000000000  |
|        | I                                         | 0.4733123053  | -0.0168880417 | 0.0000000000  |
|        | S                                         | -2.4637396173 | -0.0883435469 | 0.0000000000  |
|        | H                                         | -2.6465195514 | 0.8178781164  | 0.9676357742  |
|        | H                                         | -2.6465195514 | 0.8178781164  | -0.9676357742 |

**NOTE:** For the  $B \cdots XY$  complexes in which  $XY = \text{ICl}, \text{BrCl}, \text{Br}_2, \text{FCl},$  and  $\text{Cl}_2$ , the distances  $r(Z \cdots X)$ , where  $Z$  is the acceptor atom/centre in  $B$ , calculated at the CCSD(T)(F12c)/cc-pVDZ-F12 level, are available from the Supplementary Information associated with ref. 11. The exceptions are  $\text{N}_2 \cdots \text{Br}_2$  and  $\text{HCN} \cdots \text{Br}_2$  which were first calculated here and the optimised cartesian coordinates are given immediately below. Likewise, the distances  $r(Z \cdots \text{H})$  calculated at the same level of theory for the  $B \cdots \text{HX}$  ( $X = \text{F}, \text{Cl}, \text{Br}$  and  $\text{I}$ ) complexes are also available from the Supplementary Information associated with ref.11 (*Phys.Chem.Chem. Phys.* 2014, 16, 25199).

### Complexes $B \cdots \text{Br}_2$

|                                 |    |              |              |               |
|---------------------------------|----|--------------|--------------|---------------|
| Br <sub>2</sub>                 | Br | 0.0000000000 | 0.0000000000 | -1.7411647138 |
|                                 | Br | 0.0000000000 | 0.0000000000 | 0.5485213421  |
| N <sub>2</sub> :Br <sub>2</sub> | Br | 0.0000000000 | 0.0000000000 | -1.8737123607 |
|                                 | Br | 0.0000000000 | 0.0000000000 | 0.4177972883  |
|                                 | N  | 0.0000000000 | 0.0000000000 | 3.6033613056  |
|                                 | N  | 0.0000000000 | 0.0000000000 | 4.7021951741  |
| HCN:Br <sub>2</sub>             | Br | 0.0000000000 | 0.0000000000 | -1.8220020900 |
|                                 | Br | 0.0000000000 | 0.0000000000 | 0.4768246140  |
|                                 | N  | 0.0000000000 | 0.0000000000 | 3.3815708986  |
|                                 | C  | 0.0000000000 | 0.0000000000 | 4.5353028097  |
|                                 | H  | 0.0000000000 | 0.0000000000 | 5.6024067851  |

### Complexes $B \cdots \text{IBr}$ .

|        |                                           |              |              |               |
|--------|-------------------------------------------|--------------|--------------|---------------|
| BrI    | CCSD(T)-F12C/USERDEF ENERGY=-710.54731815 |              |              |               |
|        | Br                                        | 0.0000000000 | 0.0000000000 | -1.5206560192 |
|        | I                                         | 0.0000000000 | 0.0000000000 | 0.9574572757  |
| BrI:CO | CCSD(T)-F12C/USERDEF ENERGY=-823.73850507 |              |              |               |
|        | Br                                        | 0.0000000000 | 0.0000000000 | -2.0902977687 |

|          |                                            |               |               |               |
|----------|--------------------------------------------|---------------|---------------|---------------|
|          | I                                          | 0.0000000000  | 0.0000000000  | 0.3962705642  |
|          | C                                          | 0.0000000000  | 0.0000000000  | 3.5229305914  |
|          | O                                          | 0.0000000000  | 0.0000000000  | 4.6514468739  |
| Brl:C2H4 | CCSD(T)-F12C/USERDEF ENERGY=-789.01436503  |               |               |               |
|          | Br                                         | 0.0000000000  | 0.0000000000  | -2.0150690341 |
|          | I                                          | 0.0000000000  | 0.0000000000  | 0.4891457805  |
|          | C                                          | 0.0000000000  | 0.6697014627  | 3.5255471045  |
|          | C                                          | 0.0000000000  | -0.6697014627 | 3.5255471045  |
|          | H                                          | -0.9239993721 | 1.2330964360  | 3.5334798272  |
|          | H                                          | 0.9239993721  | 1.2330964360  | 3.5334798272  |
|          | H                                          | 0.9239993721  | -1.2330964360 | 3.5334798272  |
|          | H                                          | -0.9239993721 | -1.2330964360 | 3.5334798272  |
| Brl:C2H2 | CCSD(T)-F12C/USERDEF ENERGY=-787.76080821  |               |               |               |
|          | Br                                         | 0.0000000000  | 0.0000000000  | -1.9912760336 |
|          | I                                          | 0.0000000000  | 0.0000000000  | 0.5016134459  |
|          | C                                          | 0.0000000000  | 0.6037071544  | 3.6649061915  |
|          | C                                          | 0.0000000000  | -0.6037071544 | 3.6649061915  |
|          | H                                          | 0.0000000000  | 1.6679174804  | 3.6783383203  |
|          | H                                          | 0.0000000000  | -1.6679174804 | 3.6783383203  |
| Brl:N2   | CCSD(T)-F12C/USERDEF ENERGY=-819.95434564  |               |               |               |
|          | Br                                         | 0.0000000000  | 0.0000000000  | -2.0926480988 |
|          | I                                          | 0.0000000000  | 0.0000000000  | 0.3883941460  |
|          | N                                          | 0.0000000000  | 0.0000000000  | 3.6601002704  |
|          | N                                          | 0.0000000000  | 0.0000000000  | 4.7588448937  |
| Brl:NCH  | CCSD(T)-F12C/USERDEF ENERGY=-803.85541405  |               |               |               |
|          | Br                                         | 0.0000000000  | 0.0000000000  | -2.0482884274 |
|          | I                                          | 0.0000000000  | 0.0000000000  | 0.4456963102  |
|          | N                                          | 0.0000000000  | 0.0000000000  | 3.3678360207  |
|          | C                                          | 0.0000000000  | 0.0000000000  | 4.5208761865  |
|          | H                                          | 0.0000000000  | 0.0000000000  | 5.5882863202  |
| Brl:NH3  | CCSD(T)-F12C/USERDEF ENERGY=-767.05618640  |               |               |               |
|          | Br                                         | -0.0000000000 | 0.0000000000  | -1.8344444642 |
|          | I                                          | -0.0000000000 | 0.0000000000  | 0.6975593877  |
|          | N                                          | 0.0000000000  | 0.0000000000  | 3.3445428398  |
|          | H                                          | 0.9450071383  | 0.0000000000  | 3.7070292368  |
|          | H                                          | -0.4725035691 | 0.8184001885  | 3.7070292368  |
|          | H                                          | -0.4725035691 | -0.8184001885 | 3.7070292368  |
| Brl:OH2  | CCSD(T)-F12C/USERDEF ENERGY=-786.91571734  |               |               |               |
|          | Br                                         | 1.9292623053  | 0.0202390804  | 0.0000000000  |
|          | I                                          | -0.5645183244 | -0.0308666016 | 0.0000000000  |
|          | O                                          | -3.4029647414 | -0.0440767780 | 0.0000000000  |
|          | H                                          | -3.7875729875 | 0.3952534561  | 0.7615233517  |
|          | H                                          | -3.7875729875 | 0.3952534561  | -0.7615233517 |
| Brl:PH3  | CCSD(T)-F12C/USERDEF ENERGY=-1053.26132039 |               |               |               |
|          | Br                                         | -0.0000000000 | 0.0000000000  | -2.1255130962 |
|          | I                                          | -0.0000000000 | 0.0000000000  | 0.4084728278  |
|          | P                                          | 0.0000000000  | 0.0000000000  | 3.4078868957  |
|          | H                                          | 1.2167900744  | 0.0000000000  | 4.1154963018  |
|          | H                                          | -0.6083950372 | 1.0537711155  | 4.1154963018  |



|         |                                            |               |               |               |
|---------|--------------------------------------------|---------------|---------------|---------------|
|         | H                                          | -0.6083950372 | -1.0537711155 | 4.1154963018  |
| Brl:SH2 | CCSD(T)-F12C/USERDEF ENERGY=-1109.50572102 |               |               |               |
|         | Br                                         | -2.2691417303 | -0.0163583814 | 0.0000000000  |
|         | I                                          | 0.2350505394  | 0.0378065893  | 0.0000000000  |
|         | S                                          | 3.4265101621  | 0.0597960974  | 0.0000000000  |
|         | H                                          | 3.5291726128  | -0.8597213443 | 0.9663855401  |
|         | H                                          | 3.5291726128  | -0.8597213443 | -0.9663855401 |

### Complexes B··I<sub>2</sub>.

|         |                                           |               |               |               |
|---------|-------------------------------------------|---------------|---------------|---------------|
| I2      | CCSD(T)-F12C/USERDEF ENERGY=-710.54731815 |               |               |               |
|         | Br                                        | 0.0000000000  | 0.0000000000  | -1.5206560192 |
|         | I                                         | 0.0000000000  | 0.0000000000  | 0.9574572757  |
| I2:CO   | CCSD(T)-F12C/USERDEF ENERGY=-702.87650791 |               |               |               |
|         | I                                         | 0.0000000000  | 0.0000000000  | -1.8682289848 |
|         | I                                         | 0.0000000000  | 0.0000000000  | 0.8164085113  |
|         | C                                         | 0.0000000000  | 0.0000000000  | 4.1204622463  |
|         | O                                         | 0.0000000000  | 0.0000000000  | 5.2496234779  |
| I2:C2H4 | CCSD(T)-F12C/USERDEF ENERGY=-668.15161731 |               |               |               |
|         | I                                         | 0.0000000000  | 0.0000000000  | -1.7994996629 |
|         | I                                         | 0.0000000000  | 0.0000000000  | 0.8979187686  |
|         | C                                         | 0.0000000000  | 0.6686685488  | 4.0778094783  |
|         | C                                         | 0.0000000000  | -0.6686685488 | 4.0778094783  |
|         | H                                         | -0.9238690364 | 1.2324550893  | 4.0821737244  |
|         | H                                         | 0.9238690364  | 1.2324550893  | 4.0821737244  |
|         | H                                         | 0.9238690364  | -1.2324550893 | 4.0821737244  |
|         | H                                         | -0.9238690364 | -1.2324550893 | 4.0821737244  |
| I2:C2H2 | CCSD(T)-F12C/USERDEF ENERGY=-666.89854828 |               |               |               |
|         | I                                         | 0.0000000000  | 0.0000000000  | -1.7759640708 |
|         | I                                         | 0.0000000000  | 0.0000000000  | 0.9136900854  |
|         | C                                         | 0.0000000000  | 0.6034066803  | 4.2019819611  |
|         | C                                         | 0.0000000000  | -0.6034066803 | 4.2019819611  |
|         | H                                         | 0.0000000000  | 1.6674229917  | 4.2101783660  |
|         | H                                         | 0.0000000000  | -1.6674229917 | 4.2101783660  |
| I2:N2   | CCSD(T)-F12C/USERDEF ENERGY=-699.09296945 |               |               |               |
|         | I                                         | 0.0000000000  | 0.0000000000  | -1.8655283438 |
|         | I                                         | 0.0000000000  | 0.0000000000  | 0.8153197837  |
|         | N                                         | 0.0000000000  | 0.0000000000  | 4.2082020458  |
|         | N                                         | 0.0000000000  | 0.0000000000  | 5.3070397607  |
| I2:NCH  | CCSD(T)-F12C/USERDEF ENERGY=-682.99264099 |               |               |               |
|         | I                                         | 0.0000000000  | 0.0000000000  | -1.8258143976 |
|         | I                                         | 0.0000000000  | 0.0000000000  | 0.8650552227  |
|         | N                                         | 0.0000000000  | 0.0000000000  | 3.9159423240  |
|         | C                                         | 0.0000000000  | 0.0000000000  | 5.0695644712  |
|         | H                                         | 0.0000000000  | 0.0000000000  | 6.1368327237  |
| I2:NH3  | CCSD(T)-F12C/USERDEF ENERGY=-646.19135407 |               |               |               |
|         | I                                         | -0.0000000000 | 0.0000000000  | -1.6242121953 |
|         | I                                         | -0.0000000000 | 0.0000000000  | 1.0989754337  |
|         | N                                         | 0.0000000000  | 0.0000000000  | 3.8487550990  |

|        |                                           |               |               |               |
|--------|-------------------------------------------|---------------|---------------|---------------|
|        | H                                         | 0.9434243007  | 0.0000000000  | 4.2155363993  |
|        | H                                         | -0.4717121503 | 0.8170294109  | 4.2155363993  |
|        | H                                         | -0.4717121503 | -0.8170294109 | 4.2155363993  |
| I2:OH2 | CCSD(T)-F12C/USERDEF ENERGY=-666.05293493 |               |               |               |
|        | I                                         | 1.7625009975  | 0.0152292108  | 0.0000000000  |
|        | I                                         | -0.9279130861 | -0.0341217957 | 0.0000000000  |
|        | O                                         | -3.8717144407 | -0.0379726092 | 0.0000000000  |
|        | H                                         | -4.2718141403 | 0.3884248820  | 0.7604254184  |
|        | H                                         | -4.2718141403 | 0.3884248820  | -0.7604254184 |
| I2:PH3 | CCSD(T)-F12C/USERDEF ENERGY=-932.39728274 |               |               |               |
|        | I                                         | -0.0000000000 | 0.0000000000  | -1.9049931516 |
|        | I                                         | -0.0000000000 | 0.0000000000  | 0.8061579417  |
|        | P                                         | 0.0000000000  | 0.0000000000  | 4.0368973954  |
|        | H                                         | 1.2069679771  | 0.0000000000  | 4.7655716204  |
|        | H                                         | -0.6034839886 | 1.0452649297  | 4.7655716204  |
|        | H                                         | -0.6034839886 | -1.0452649297 | 4.7655716204  |
| I2:SH2 | CCSD(T)-F12C/USERDEF ENERGY=-988.64281809 |               |               |               |
|        | I                                         | -2.0999056870 | -0.0084896598 | 0.0000000000  |
|        | I                                         | 0.5975077805  | 0.0495051050  | 0.0000000000  |
|        | S                                         | 3.9322044407  | 0.0430221214  | 0.0000000000  |
|        | H                                         | 3.9912843889  | -0.8808054064 | 0.9655261812  |
|        | H                                         | 3.9912843889  | -0.8808054064 | -0.9655261812 |

### Complexes B...ICN.

|          |                                           |               |               |               |
|----------|-------------------------------------------|---------------|---------------|---------------|
| NCI      | CCSD(T)-F12C/USERDEF ENERGY=-387.53255620 |               |               |               |
|          | I                                         | 0.0000000000  | 0.0000000000  | -0.4466839221 |
|          | C                                         | 0.0000000000  | 0.0000000000  | 1.5532815718  |
|          | N                                         | 0.0000000000  | 0.0000000000  | 2.7151389585  |
| NCI:CO   | CCSD(T)-F12C/USERDEF ENERGY=-500.72343266 |               |               |               |
|          | C                                         | 0.0000000000  | 0.0000000000  | -2.2371277654 |
|          | I                                         | 0.0000000000  | 0.0000000000  | -0.2309711639 |
|          | N                                         | 0.0000000000  | 0.0000000000  | -3.3990726660 |
|          | C                                         | 0.0000000000  | 0.0000000000  | 3.0609211311  |
|          | O                                         | 0.0000000000  | 0.0000000000  | 4.1893256587  |
| NCI:C2H4 | CCSD(T)-F12C/USERDEF ENERGY=-465.99790411 |               |               |               |
|          | C                                         | 0.0000000000  | 0.0000000000  | -2.1432982092 |
|          | I                                         | 0.0000000000  | 0.0000000000  | -0.1309401993 |
|          | N                                         | 0.0000000000  | 0.0000000000  | -3.3053741955 |
|          | C                                         | 0.0000000000  | 0.6680923630  | 3.1592996992  |
|          | C                                         | 0.0000000000  | -0.6680923630 | 3.1592996992  |
|          | H                                         | -0.9238288052 | 1.2322975781  | 3.1660764860  |
|          | H                                         | 0.9238288052  | 1.2322975781  | 3.1660764860  |
|          | H                                         | 0.9238288052  | -1.2322975781 | 3.1660764860  |
|          | H                                         | -0.9238288052 | -1.2322975781 | 3.1660764860  |
| NCI:C2H2 | CCSD(T)-F12C/USERDEF ENERGY=-464.74542992 |               |               |               |
|          | C                                         | 0.0000000000  | 0.0000000000  | -2.1093499396 |
|          | I                                         | 0.0000000000  | 0.0000000000  | -0.1001679915 |
|          | N                                         | 0.0000000000  | 0.0000000000  | -3.2713966469 |

|         |                                           |               |               |               |
|---------|-------------------------------------------|---------------|---------------|---------------|
|         | C                                         | 0.0000000000  | 0.6033217901  | 3.2198704013  |
|         | C                                         | 0.0000000000  | -0.6033217901 | 3.2198704013  |
|         | H                                         | 0.0000000000  | 1.6675400029  | 3.2348184367  |
|         | H                                         | 0.0000000000  | -1.6675400029 | 3.2348184367  |
| NCI:N2  | CCSD(T)-F12C/USERDEF ENERGY=-496.93971001 |               |               |               |
|         | C                                         | 0.0000000000  | 0.0000000000  | -2.2232781124 |
|         | I                                         | 0.0000000000  | 0.0000000000  | -0.2203815775 |
|         | N                                         | 0.0000000000  | 0.0000000000  | -3.3851874934 |
|         | N                                         | 0.0000000000  | 0.0000000000  | 3.0948658699  |
|         | N                                         | 0.0000000000  | 0.0000000000  | 4.1935540515  |
| NCI:NCH | CCSD(T)-F12C/USERDEF ENERGY=-480.84148152 |               |               |               |
|         | C                                         | 0.0000000000  | 0.0000000000  | -2.1732935414 |
|         | I                                         | 0.0000000000  | 0.0000000000  | -0.1621006548 |
|         | N                                         | 0.0000000000  | 0.0000000000  | -3.3354842504 |
|         | N                                         | 0.0000000000  | 0.0000000000  | 2.8604018537  |
|         | C                                         | 0.0000000000  | 0.0000000000  | 4.0136309425  |
|         | H                                         | 0.0000000000  | 0.0000000000  | 5.0811482038  |
| NCI:NH3 | CCSD(T)-F12C/USERDEF ENERGY=-444.03866349 |               |               |               |
|         | C                                         | -0.0000000000 | 0.0000000000  | -1.9162686383 |
|         | I                                         | -0.0000000000 | 0.0000000000  | 0.1129399412  |
|         | N                                         | 0.0000000000  | 0.0000000000  | -3.0786273070 |
|         | N                                         | 0.0000000000  | 0.0000000000  | 2.9745946792  |
|         | H                                         | 0.9391486398  | 0.0000000000  | 3.3536281958  |
|         | H                                         | -0.4695743199 | 0.8133265800  | 3.3536281958  |
|         | H                                         | -0.4695743199 | -0.8133265800 | 3.3536281958  |
| NCI:OH2 | CCSD(T)-F12C/USERDEF ENERGY=-463.90157031 |               |               |               |
|         | N                                         | 3.1224305886  | 0.0135778980  | 0.0000000000  |
|         | C                                         | 1.9602852565  | 0.0067782045  | 0.0000000000  |
|         | I                                         | -0.0509230366 | -0.0042936282 | 0.0000000000  |
|         | O                                         | -2.9688351347 | -0.0435841141 | 0.0000000000  |
|         | H                                         | -3.4983733152 | 0.2008915291  | 0.7611368763  |
|         | H                                         | -3.4983733152 | 0.2008915291  | -0.7611368763 |
| NCI:PH3 | CCSD(T)-F12C/USERDEF ENERGY=-730.24346765 |               |               |               |
|         | C                                         | -0.0000000000 | 0.0000000000  | -2.2857497073 |
|         | I                                         | -0.0000000000 | 0.0000000000  | -0.2695289997 |
|         | N                                         | 0.0000000000  | 0.0000000000  | -3.4479006079 |
|         | P                                         | 0.0000000000  | 0.0000000000  | 3.1685669679  |
|         | H                                         | 1.2024668671  | 0.0000000000  | 3.9056894558  |
|         | H                                         | -0.6012334336 | 1.0413668541  | 3.9056894558  |
|         | H                                         | -0.6012334336 | -1.0413668541 | 3.9056894558  |
| NCI:SH2 | CCSD(T)-F12C/USERDEF ENERGY=-786.48949054 |               |               |               |
|         | N                                         | 3.5171199314  | 0.0587952855  | 0.0000000000  |
|         | C                                         | 2.3553657230  | 0.0296826542  | 0.0000000000  |
|         | I                                         | 0.3426069682  | -0.0200289698 | 0.0000000000  |
|         | S                                         | -3.0776919404 | -0.0663047341 | 0.0000000000  |
|         | H                                         | -3.2470306361 | 0.8428820470  | 0.9662460072  |
|         | H                                         | -3.2470306361 | 0.8428820470  | -0.9662460072 |

### Complexes B...ICCH.

|           |                                                                                                                                                                                                                                                                                                                                                                                                                                                                                                            |
|-----------|------------------------------------------------------------------------------------------------------------------------------------------------------------------------------------------------------------------------------------------------------------------------------------------------------------------------------------------------------------------------------------------------------------------------------------------------------------------------------------------------------------|
| HCCI      | CCSD(T)-F12C/USERDEF ENERGY=-371.43971537<br>I 0.0000000000 0.0000000000 -0.4394124120<br>C 0.0000000000 0.0000000000 1.5562121190<br>C 0.0000000000 0.0000000000 2.7652090011<br>H 0.0000000000 0.0000000000 3.8288180204                                                                                                                                                                                                                                                                                 |
| HCCI:CO   | CCSD(T)-F12C/USERDEF ENERGY=-484.62965738<br>C 0.0000000000 0.0000000000 -2.2547215533<br>I 0.0000000000 0.0000000000 -0.2551098542<br>C 0.0000000000 0.0000000000 -3.4642032059<br>H 0.0000000000 0.0000000000 -4.5277424711<br>C 0.0000000000 0.0000000000 3.1260538125<br>O 0.0000000000 0.0000000000 4.2552523085                                                                                                                                                                                      |
| HCCI:C2H4 | CCSD(T)-F12C/USERDEF ENERGY=-449.90355575<br>C 0.0000000000 0.0000000000 -2.1601431503<br>I 0.0000000000 0.0000000000 -0.1565215098<br>C 0.0000000000 0.0000000000 -3.3698882243<br>H 0.0000000000 0.0000000000 -4.4334368103<br>C 0.0000000000 0.6676202741 3.2345571490<br>C 0.0000000000 -0.6676202741 3.2345571490<br>H -0.9236966757 1.2318649055 3.2374789453<br>H 0.9236966757 1.2318649055 3.2374789453<br>H 0.9236966757 -1.2318649055 3.2374789453<br>H -0.9236966757 -1.2318649055 3.2374789453 |
| HCCI:C2H2 | CCSD(T)-F12C/USERDEF ENERGY=-448.65120935<br>C 0.0000000000 0.0000000000 -2.1253852292<br>I 0.0000000000 0.0000000000 -0.1238585074<br>C 0.0000000000 0.0000000000 -3.3350371516<br>H 0.0000000000 0.0000000000 -4.3985725886<br>C 0.0000000000 0.6031257152 3.2922440165<br>C 0.0000000000 -0.6031257152 3.2922440165<br>H 0.0000000000 1.6670027478 3.2991339442<br>H 0.0000000000 -1.6670027478 3.2991339442                                                                                            |
| HCCI:NCH  | CCSD(T)-F12C/USERDEF ENERGY=-464.74570721<br>C 0.0000000000 0.0000000000 -2.1923118825<br>I 0.0000000000 0.0000000000 -0.1886474922<br>C 0.0000000000 0.0000000000 -3.4024512067<br>H 0.0000000000 0.0000000000 -4.4658270078<br>N 0.0000000000 0.0000000000 2.9432642559<br>C 0.0000000000 0.0000000000 4.0970548295<br>H 0.0000000000 0.0000000000 5.1642216610                                                                                                                                          |
| HCCI:NH3  | CCSD(T)-F12C/USERDEF ENERGY=-427.94170012<br>C -0.0000000000 0.0000000000 -1.9241218956<br>I -0.0000000000 0.0000000000 0.0905738969<br>C 0.0000000000 0.0000000000 -3.1348953389<br>H 0.0000000000 0.0000000000 -4.1983173116<br>N 0.0000000000 0.0000000000 3.0741414596<br>H 0.9387668170 0.0000000000 3.4534509843<br>H -0.4693834085 0.8129959117 3.4534509843                                                                                                                                        |

|          |                                           |               |               |               |
|----------|-------------------------------------------|---------------|---------------|---------------|
|          | H                                         | -0.4693834085 | -0.8129959117 | 3.4534509843  |
| HCCI:OH2 | CCSD(T)-F12C/USERDEF ENERGY=-447.80596968 |               |               |               |
|          | H                                         | 4.2440291607  | 0.0334818391  | 0.0000000000  |
|          | C                                         | 3.1808438277  | 0.0144979968  | 0.0000000000  |
|          | C                                         | 1.9709357309  | -0.0073883601 | 0.0000000000  |
|          | I                                         | -0.0328657301 | -0.0454716383 | 0.0000000000  |
|          | O                                         | -3.0495133419 | -0.1047113358 | 0.0000000000  |
|          | H                                         | -3.5318823377 | 0.2255704498  | 0.7600023674  |
|          | H                                         | -3.5318823377 | 0.2255704498  | -0.7600023674 |
| HCCI:PH3 | CCSD(T)-F12C/USERDEF ENERGY=-714.14867959 |               |               |               |
|          | C                                         | -0.0000000000 | 0.0000000000  | -2.3085101998 |
|          | I                                         | -0.0000000000 | 0.0000000000  | -0.3030478568 |
|          | C                                         | 0.0000000000  | 0.0000000000  | -3.5184123289 |
|          | H                                         | 0.0000000000  | 0.0000000000  | -4.5818835543 |
|          | P                                         | 0.0000000000  | 0.0000000000  | 3.2592242722  |
|          | H                                         | 1.1979726035  | 0.0000000000  | 4.0059954936  |
|          | H                                         | -0.5989863018 | 1.0374747077  | 4.0059954936  |
|          | H                                         | -0.5989863018 | -1.0374747077 | 4.0059954936  |
| HCCI:SH2 | CCSD(T)-F12C/USERDEF ENERGY=-770.39488746 |               |               |               |
|          | H                                         | -4.6312476187 | -0.1091001344 | 0.0000000000  |
|          | C                                         | -3.5680925623 | -0.0761153352 | 0.0000000000  |
|          | C                                         | -2.3587987351 | -0.0394652923 | 0.0000000000  |
|          | I                                         | -0.3561922893 | 0.0243868427  | 0.0000000000  |
|          | S                                         | 3.1784854928  | 0.0574772079  | 0.0000000000  |
|          | H                                         | 3.2699907613  | -0.8635664194 | 0.9653739949  |
|          | H                                         | 3.2699907613  | -0.8635664194 | -0.9653739949 |

### Complexes B...BrF.

|          |                                           |               |               |               |
|----------|-------------------------------------------|---------------|---------------|---------------|
| HCCI     | CCSD(T)-F12C/USERDEF ENERGY=-515.41062412 |               |               |               |
|          | Br                                        | 0.0000000000  | 0.0000000000  | -0.3376893193 |
|          | F                                         | 0.0000000000  | 0.0000000000  | 1.4202629228  |
| FBr:CO   | CCSD(T)-F12C/USERDEF ENERGY=-628.60550772 |               |               |               |
|          | F                                         | 0.0000000000  | 0.0000000000  | -2.2143721024 |
|          | Br                                        | 0.0000000000  | 0.0000000000  | -0.4368891507 |
|          | C                                         | 0.0000000000  | 0.0000000000  | 2.1045215441  |
|          | O                                         | 0.0000000000  | 0.0000000000  | 3.2314534310  |
| FBr:C2H4 | CCSD(T)-F12C/USERDEF ENERGY=-593.88206026 |               |               |               |
|          | F                                         | 0.0000000000  | 0.0000000000  | -2.1026992379 |
|          | Br                                        | 0.0000000000  | 0.0000000000  | -0.3050797228 |
|          | C                                         | 0.0000000000  | 0.6723914512  | 2.2904079824  |
|          | C                                         | 0.0000000000  | -0.6723914512 | 2.2904079824  |
|          | H                                         | -0.9241458667 | 1.2342671474  | 2.3078846775  |
|          | H                                         | 0.9241458667  | 1.2342671474  | 2.3078846775  |
|          | H                                         | 0.9241458667  | -1.2342671474 | 2.3078846775  |
|          | H                                         | -0.9241458667 | -1.2342671474 | 2.3078846775  |
| FBr:C2H2 | CCSD(T)-F12C/USERDEF ENERGY=-592.62710450 |               |               |               |
|          | F                                         | 0.0000000000  | 0.0000000000  | -2.0855380337 |

|         |                                           |               |               |               |
|---------|-------------------------------------------|---------------|---------------|---------------|
|         | Br                                        | 0.0000000000  | 0.0000000000  | -0.3067683959 |
|         | C                                         | 0.0000000000  | 0.6043132109  | 2.4613263465  |
|         | C                                         | 0.0000000000  | -0.6043132109 | 2.4613263465  |
|         | H                                         | 0.0000000000  | 1.6685118171  | 2.4842413459  |
|         | H                                         | 0.0000000000  | -1.6685118171 | 2.4842413459  |
| FBr:N2  | CCSD(T)-F12C/USERDEF ENERGY=-624.81905587 |               |               |               |
|         | F                                         | 0.0000000000  | 0.0000000000  | -2.2460928460 |
|         | Br                                        | 0.0000000000  | 0.0000000000  | -0.4842278466 |
|         | N                                         | 0.0000000000  | 0.0000000000  | 2.3552448112  |
|         | N                                         | 0.0000000000  | 0.0000000000  | 3.4536836958  |
| FBr:NCH | CCSD(T)-F12C/USERDEF ENERGY=-608.72231796 |               |               |               |
|         | F                                         | 0.0000000000  | 0.0000000000  | -2.1831223339 |
|         | Br                                        | 0.0000000000  | 0.0000000000  | -0.4052269572 |
|         | N                                         | 0.0000000000  | 0.0000000000  | 2.1381451107  |
|         | C                                         | 0.0000000000  | 0.0000000000  | 3.2898842308  |
|         | H                                         | 0.0000000000  | 0.0000000000  | 4.3573388007  |
| FBr:NH3 | CCSD(T)-F12C/USERDEF ENERGY=-571.92713909 |               |               |               |
|         | F                                         | 0.0000000000  | 0.0000000000  | -1.8721680477 |
|         | Br                                        | 0.0000000000  | 0.0000000000  | -0.0537797602 |
|         | N                                         | 0.0000000000  | 0.0000000000  | 2.2780588271  |
|         | H                                         | 0.9479801286  | 0.0000000000  | 2.6315503032  |
|         | H                                         | -0.4739900643 | 0.8209748737  | 2.6315503032  |
|         | H                                         | -0.4739900643 | -0.8209748737 | 2.6315503032  |
| FBr:OH2 | CCSD(T)-F12C/USERDEF ENERGY=-591.78259009 |               |               |               |
|         | F                                         | 1.9762270301  | 0.0386786547  | 0.0000000000  |
|         | Br                                        | 0.1998814921  | -0.0206014753 | 0.0000000000  |
|         | O                                         | -2.3150957069 | -0.0767148088 | 0.0000000000  |
|         | H                                         | -2.6510994877 | 0.3993172047  | 0.7629610535  |
|         | H                                         | -2.6510994877 | 0.3993172047  | -0.7629610535 |
| FBr:PH3 | CCSD(T)-F12C/USERDEF ENERGY=-858.13480678 |               |               |               |
|         | F                                         | 0.0000000000  | 0.0000000000  | -2.2441556854 |
|         | Br                                        | 0.0000000000  | 0.0000000000  | -0.3698040132 |
|         | P                                         | 0.0000000000  | 0.0000000000  | 2.0645548026  |
|         | H                                         | 1.2380306590  | 0.0000000000  | 2.7240936997  |
|         | H                                         | -0.6190153295 | 1.0721660013  | 2.7240936997  |
|         | H                                         | -0.6190153295 | -1.0721660013 | 2.7240936997  |

### Complexes B...HCN

|        |   |              |              |               |
|--------|---|--------------|--------------|---------------|
| NCH:N2 | N | 0.0000000000 | 0.0000000000 | -1.3722450524 |
|        | C | 0.0000000000 | 0.0000000000 | -0.2169612492 |
|        | H | 0.0000000000 | 0.0000000000 | 0.8511397654  |
|        | N | 0.0000000000 | 0.0000000000 | 3.3414037302  |
|        | N | 0.0000000000 | 0.0000000000 | 4.4400774247  |
| NCH:CO | N | 0.0000000000 | 0.0000000000 | -1.4028896314 |
|        | C | 0.0000000000 | 0.0000000000 | -0.2475131425 |
|        | H | 0.0000000000 | 0.0000000000 | 0.8217196563  |
|        | C | 0.0000000000 | 0.0000000000 | 3.3717401885  |
|        | O | 0.0000000000 | 0.0000000000 | 4.5003575480  |

|          |   |               |               |               |
|----------|---|---------------|---------------|---------------|
| NCH:PH3  | N | 0.0000000000  | 0.0000000000  | 1.3483995452  |
|          | C | 0.0000000000  | 0.0000000000  | 0.1928062724  |
|          | H | -0.0000000000 | 0.0000000000  | -0.8788016271 |
|          | P | -0.0000000000 | 0.0000000000  | -3.6987838636 |
|          | H | 1.1976536451  | 0.0000000000  | -4.4452654095 |
|          | H | -0.5988268226 | -1.0371984816 | -4.4452654095 |
|          | H | -0.5988268226 | 1.0371984816  | -4.4452654095 |
| NCH:C2H2 | C | 0.0000000000  | 0.6029721237  | -0.0102526191 |
|          | C | 0.0000000000  | -0.6029721237 | -0.0102526191 |
|          | H | 0.0000000000  | 1.6669662198  | -0.0202295286 |
|          | H | 0.0000000000  | -1.6669662198 | -0.0202295286 |
|          | H | 0.0000000000  | 0.0000000000  | 2.5524634145  |
|          | C | 0.0000000000  | 0.0000000000  | 3.6231863839  |
|          | N | 0.0000000000  | 0.0000000000  | 4.7787185815  |
| NCH:C2H4 | C | -0.0097590785 | 0.6673412265  | 0.0000000000  |
|          | C | -0.0097590785 | -0.6673412265 | 0.0000000000  |
|          | H | -0.0152691214 | 1.2317382976  | 0.9236043120  |
|          | H | -0.0152691214 | 1.2317382976  | -0.9236043120 |
|          | H | -0.0152691214 | -1.2317382976 | 0.9236043120  |
|          | H | -0.0152691214 | -1.2317382976 | -0.9236043120 |
|          | H | 2.6040046632  | 0.0000000000  | 0.0000000000  |
|          | C | 3.6748282148  | 0.0000000000  | 0.0000000000  |
|          | N | 4.8303720756  | 0.0000000000  | 0.0000000000  |
| NCH:NCH  | N | 0.0000000000  | 0.0000000000  | -3.6841007575 |
|          | C | 0.0000000000  | 0.0000000000  | -2.5284058081 |
|          | H | 0.0000000000  | 0.0000000000  | -1.4555059138 |
|          | N | 0.0000000000  | 0.0000000000  | 0.7625672393  |
|          | C | 0.0000000000  | 0.0000000000  | 1.9160545306  |
|          | H | 0.0000000000  | 0.0000000000  | 2.9833567472  |
| NCH:OH2  | N | 0.0000000000  | 0.0593680336  | 1.1546691136  |
|          | C | 0.0000000000  | -0.0053534964 | 0.0007467906  |
|          | H | 0.0000000000  | -0.0651614667 | -1.0719959108 |
|          | O | 0.0000000000  | -0.1677950296 | -3.1245573680 |
|          | H | 0.7604499900  | -0.1976439196 | -3.7068559209 |
|          | H | -0.7604499900 | -0.1976439196 | -3.7068559209 |
| NCH:NH3  | N | 0.0000000000  | 0.0000000000  | 1.2754701741  |
|          | C | -0.0000000000 | 0.0000000000  | 0.1191970414  |
|          | H | -0.0000000000 | 0.0000000000  | -0.9623684769 |
|          | N | -0.0000000000 | 0.0000000000  | -3.0810425497 |
|          | H | 0.9364180618  | 0.0000000000  | -3.4668343540 |
|          | H | -0.4682090309 | -0.8109618300 | -3.4668343540 |
|          | H | -0.4682090309 | 0.8109618300  | -3.4668343540 |

### Complexes B...HCCH

|         |   |              |              |               |
|---------|---|--------------|--------------|---------------|
| HCCH:N2 | H | 0.0000000000 | 0.0000000000 | -4.1001357383 |
|         | C | 0.0000000000 | 0.0000000000 | -3.0370556549 |
|         | C | 0.0000000000 | 0.0000000000 | -1.8314597384 |
|         | H | 0.0000000000 | 0.0000000000 | -0.7675774582 |

|           |   |               |               |               |
|-----------|---|---------------|---------------|---------------|
|           | N | 0.000000000   | 0.000000000   | 1.8503734208  |
|           | N | 0.000000000   | 0.000000000   | 2.9492236801  |
| HCCH:CO   | H | 0.000000000   | 0.000000000   | -4.1314927618 |
|           | C | 0.000000000   | 0.000000000   | -3.0684392910 |
|           | C | 0.000000000   | 0.000000000   | -1.8626815198 |
|           | H | 0.000000000   | 0.000000000   | -0.7980917383 |
|           | C | 0.000000000   | 0.000000000   | 1.8972585391  |
|           | O | 0.000000000   | 0.000000000   | 3.026815283   |
| HCCH:PH3  | H | 0.000000000   | 0.000000000   | 2.5377316899  |
|           | C | 0.000000000   | 0.000000000   | 1.4747249882  |
|           | C | -0.000000000  | 0.000000000   | 0.2687318890  |
|           | H | -0.000000000  | 0.000000000   | -0.7970820876 |
|           | P | -0.000000000  | 0.000000000   | -3.7833724674 |
|           | H | 1.1938674440  | 0.000000000   | -4.5383033045 |
|           | H | -0.5969337221 | -1.0339195353 | -4.5383033046 |
|           | H | -0.5969337221 | 1.0339195353  | -4.5383033046 |
| HCCH:C2H2 | C | 0.000000000   | 0.6028196059  | -0.0814353801 |
|           | C | 0.000000000   | -0.6028196059 | -0.0814353801 |
|           | H | 0.000000000   | 1.6664459751  | -0.0834574427 |
|           | H | 0.000000000   | -1.6664459751 | -0.0834574427 |
|           | H | 0.000000000   | 0.000000000   | 2.6131912649  |
|           | C | 0.000000000   | 0.000000000   | 3.6786717942  |
|           | C | 0.000000000   | 0.000000000   | 4.8846396633  |
|           | H | 0.000000000   | 0.000000000   | 5.9476870077  |
| HCCH:C2H4 | C | -0.0746736864 | 0.6670034778  | 0.0000000000  |
|           | C | -0.0746736864 | -0.6670034778 | 0.0000000000  |
|           | H | -0.0763450489 | 1.2313079659  | 0.9235089741  |
|           | H | -0.0763450489 | 1.2313079659  | -0.9235089741 |
|           | H | -0.0763450489 | -1.2313079659 | 0.9235089741  |
|           | H | -0.0763450489 | -1.2313079659 | -0.9235089741 |
|           | H | 2.6829766937  | 0.0000000000  | 0.0000000000  |
|           | C | 3.7484734915  | 0.0000000000  | 0.0000000000  |
|           | C | 4.9543995594  | 0.0000000000  | 0.0000000000  |
|           | H | 6.0174881350  | 0.0000000000  | 0.0000000000  |
| HCCH:NCH  | H | 0.000000000   | 0.000000000   | -4.0302052661 |
|           | C | 0.000000000   | 0.000000000   | -2.9673069916 |
|           | C | 0.000000000   | 0.000000000   | -1.7608886068 |
|           | H | 0.000000000   | 0.000000000   | -0.6938001963 |
|           | N | 0.000000000   | 0.000000000   | 1.6813499701  |
|           | C | 0.000000000   | 0.000000000   | 2.8355593437  |
|           | H | 0.000000000   | 0.000000000   | 3.9025380766  |
| HCCH:OH2  | H | 0.000000000   | 0.1169579480  | 2.3157978973  |
|           | C | 0.000000000   | 0.0623900842  | 1.2542441023  |
|           | C | 0.000000000   | -0.0020545882 | 0.0494063768  |
|           | H | 0.000000000   | -0.0579863605 | -1.0170990623 |
|           | O | 0.000000000   | -0.1725279659 | -3.2133971328 |
|           | H | 0.7595615643  | -0.2035044580 | -3.7969006988 |
|           | H | -0.7595615643 | -0.2035044580 | -3.7969006988 |
| HCCH:NH3  | H | -0.000000000  | 0.000000000   | 2.4473510704  |



|  |   |               |               |               |
|--|---|---------------|---------------|---------------|
|  | C | 0.0000000000  | 0.0000000000  | 1.3844181679  |
|  | C | 0.0000000000  | 0.0000000000  | 0.1772227712  |
|  | H | 0.0000000000  | 0.0000000000  | -0.8946385983 |
|  | N | -0.0000000000 | 0.0000000000  | -3.1818533675 |
|  | H | 0.9368904155  | 0.0000000000  | -3.5655823056 |
|  | H | -0.4684452077 | -0.8113709003 | -3.5655823056 |
|  | H | -0.4684452077 | 0.8113709003  | -3.5655823056 |

### Complexes B...HCP

|          |   |               |               |               |
|----------|---|---------------|---------------|---------------|
| PCH:N2   | P | 0.0000000000  | 0.0000000000  | -4.2524717379 |
|          | C | 0.0000000000  | 0.0000000000  | -2.7091182432 |
|          | H | 0.0000000000  | 0.0000000000  | -1.6368264192 |
|          | N | 0.0000000000  | 0.0000000000  | 0.9962814555  |
|          | N | 0.0000000000  | 0.0000000000  | 2.0951746548  |
| PCH:CO   | P | 0.0000000000  | 0.0000000000  | -4.2954597411 |
|          | C | 0.0000000000  | 0.0000000000  | -2.7519071413 |
|          | H | 0.0000000000  | 0.0000000000  | -1.6790304204 |
|          | C | 0.0000000000  | 0.0000000000  | 1.0449134214  |
|          | O | 0.0000000000  | 0.0000000000  | 2.1745235915  |
| PCH:PH3  | P | 0.0000000000  | 0.0000000000  | 1.8373116342  |
|          | C | -0.0000000000 | 0.0000000000  | 0.2933428581  |
|          | H | -0.0000000000 | 0.0000000000  | -0.7807509096 |
|          | P | 0.0000000000  | 0.0000000000  | -3.7667848159 |
|          | H | 1.1937768035  | 0.0000000000  | -4.5219512927 |
|          | H | -0.5968884017 | -1.0338410382 | -4.5219512927 |
|          | H | -0.5968884017 | 1.0338410382  | -4.5219512927 |
| PCH:C2H2 | C | 0.0000000000  | 0.6028278283  | -0.0452922559 |
|          | C | 0.0000000000  | -0.6028278283 | -0.0452922559 |
|          | H | 0.0000000000  | 1.6664252871  | -0.0482134648 |
|          | H | 0.0000000000  | -1.6664252871 | -0.0482134648 |
|          | H | 0.0000000000  | 0.0000000000  | 2.6554452569  |
|          | C | 0.0000000000  | 0.0000000000  | 3.7291722268  |
|          | P | 0.0000000000  | 0.0000000000  | 5.2730617073  |
| PCH:C2H4 | C | -0.0291432711 | 0.6669824814  | 0.0000000000  |
|          | C | -0.0291432711 | -0.6669824814 | 0.0000000000  |
|          | H | -0.0306694984 | 1.2313060189  | 0.9234969618  |
|          | H | -0.0306694984 | 1.2313060189  | -0.9234969618 |
|          | H | -0.0306694984 | -1.2313060189 | 0.9234969618  |
|          | H | -0.0306694984 | -1.2313060189 | -0.9234969618 |
|          | H | 2.7345969219  | 0.0000000000  | 0.0000000000  |
|          | C | 3.8083968347  | 0.0000000000  | 0.0000000000  |
|          | P | 5.3522927362  | 0.0000000000  | 0.0000000000  |
| PCH:NCH  | P | 0.0000000000  | 0.0000000000  | -4.1467634618 |
|          | C | 0.0000000000  | 0.0000000000  | -2.6022035951 |
|          | H | 0.0000000000  | 0.0000000000  | -1.5272852262 |
|          | N | 0.0000000000  | 0.0000000000  | 0.8598714976  |
|          | C | 0.0000000000  | 0.0000000000  | 2.0141419716  |
|          | H | 0.0000000000  | 0.0000000000  | 3.0811361228  |
| PCH:OH2  | P | 0.0000000000  | 0.0547876112  | 1.7830442347  |

|         |   |               |               |               |
|---------|---|---------------|---------------|---------------|
|         | C | 0.0000000000  | -0.0131912975 | 0.2398400601  |
|         | H | 0.0000000000  | -0.0622438235 | -0.8347543193 |
|         | O | 0.0000000000  | -0.1641404460 | -3.0463481932 |
|         | H | 0.7593875560  | -0.1947209213 | -3.6302349337 |
|         | H | -0.7593875560 | -0.1947209213 | -3.6302349337 |
| PCH:NH3 | P | -0.0000000000 | 0.0000000000  | 1.8818291410  |
|         | C | -0.0000000000 | 0.0000000000  | 0.3362532999  |
|         | H | 0.0000000000  | 0.0000000000  | -0.7432301415 |
|         | N | -0.0000000000 | 0.0000000000  | -3.0402858093 |
|         | H | 0.9368521161  | 0.0000000000  | -3.4242452572 |
|         | H | -0.4684260581 | -0.8113377321 | -3.4242452572 |
|         | H | -0.4684260581 | 0.8113377321  | -3.4242452572 |
| PCH:SH2 | P | 0.0000000000  | 0.0452430699  | 1.9531502342  |
|         | C | 0.0000000000  | 0.1034398719  | 0.4102514178  |
|         | H | 0.0000000000  | 0.1428735827  | -0.6633866383 |
|         | S | 0.0000000000  | 0.0008847225  | -3.5293709848 |
|         | H | 0.9648907882  | -0.9176180775 | -3.6401259166 |
|         | H | -0.9648907882 | -0.9176180775 | -3.6401259166 |

### Complexes B...CuBr.

|           |                                    |               |               |               |
|-----------|------------------------------------|---------------|---------------|---------------|
| BrCu      | CCSD(T)/AVTZ ENERGY=-4212.16859941 |               |               |               |
|           | Br                                 | 0.0000000000  | 0.0000000000  | -0.9791284158 |
|           | Cu                                 | 0.0000000000  | 0.0000000000  | 1.2311754782  |
| BrCu:CO   | CCSD(T)/AVTZ ENERGY=-4325.38500938 |               |               |               |
|           | Br                                 | 0.0000000000  | 0.0000000000  | -1.5818762108 |
|           | Cu                                 | 0.0000000000  | 0.0000000000  | 0.6238188127  |
|           | C                                  | 0.0000000000  | 0.0000000000  | 2.4497759553  |
|           | O                                  | 0.0000000000  | 0.0000000000  | 3.5834335962  |
| BrCu:C2H4 | CCSD(T)/AVTZ ENERGY=-4290.66518670 |               |               |               |
|           | Br                                 | 0.0000000000  | 0.0000000000  | -1.5041060890 |
|           | Cu                                 | 0.0000000000  | 0.0000000000  | 0.7126982332  |
|           | C                                  | 0.0000000000  | 0.6850734324  | 2.6575428865  |
|           | C                                  | 0.0000000000  | -0.6850734324 | 2.6575428865  |
|           | H                                  | -0.9250185030 | 1.2457841569  | 2.7420966988  |
|           | H                                  | 0.9250185030  | 1.2457841569  | 2.7420966988  |
|           | H                                  | 0.9250185030  | -1.2457841569 | 2.7420966988  |
|           | H                                  | -0.9250185030 | -1.2457841569 | 2.7420966988  |
| BrCu:C2H2 | CCSD(T)/AVTZ ENERGY=-4289.41015098 |               |               |               |
|           | Br                                 | 0.0000000000  | 0.0000000000  | -1.4700330612 |
|           | Cu                                 | 0.0000000000  | 0.0000000000  | 0.7464387300  |
|           | C                                  | 0.0000000000  | 0.6159176017  | 2.6733673126  |
|           | C                                  | 0.0000000000  | -0.6159176017 | 2.6733673126  |
|           | H                                  | 0.0000000000  | 1.6652159419  | 2.8814694347  |
|           | H                                  | 0.0000000000  | -1.6652159419 | 2.8814694347  |
| BrCu:N2   | CCSD(T)/AVTZ ENERGY=-4321.58212839 |               |               |               |
|           | Br                                 | 0.0000000000  | 0.0000000000  | -1.5699983008 |

|          |                                    |               |               |               |
|----------|------------------------------------|---------------|---------------|---------------|
|          | Cu                                 | 0.0000000000  | 0.0000000000  | 0.6299786780  |
|          | N                                  | 0.0000000000  | 0.0000000000  | 2.4967946765  |
|          | N                                  | 0.0000000000  | 0.0000000000  | 3.6014668091  |
| BrCu:NCH | CCSD(T)/AVTZ ENERGY=-4305.50315828 |               |               |               |
|          | Br                                 | 0.0000000000  | 0.0000000000  | -1.5627648365 |
|          | Cu                                 | 0.0000000000  | 0.0000000000  | 0.6456587914  |
|          | N                                  | 0.0000000000  | 0.0000000000  | 2.5064370537  |
|          | C                                  | 0.0000000000  | 0.0000000000  | 3.6606357660  |
|          | H                                  | 0.0000000000  | 0.0000000000  | 4.7297655298  |
| BrCu:NH3 | CCSD(T)/AVTZ ENERGY=-4268.71203133 |               |               |               |
|          | Br                                 | -0.0000000000 | 0.0000000000  | -1.3226376751 |
|          | Cu                                 | -0.0000000000 | 0.0000000000  | 0.8868720224  |
|          | N                                  | 0.0000000000  | 0.0000000000  | 2.8288326505  |
|          | H                                  | 0.9426687608  | 0.0000000000  | 3.2092720369  |
|          | H                                  | -0.4713343804 | 0.8163750942  | 3.2092720369  |
|          | H                                  | -0.4713343804 | -0.8163750942 | 3.2092720369  |
| BrCu:OH2 | CCSD(T)/AVTZ ENERGY=-4288.55235807 |               |               |               |
|          | Cu                                 | 0.0000000000  | 0.0159412252  | -0.8668533109 |
|          | Br                                 | 0.0000000000  | -0.0069250451 | 1.3356393335  |
|          | O                                  | 0.0000000000  | 0.0189508743  | -2.8192081150 |
|          | H                                  | 0.7704167639  | -0.3784277391 | -3.2403845954 |
|          | H                                  | -0.7704167639 | -0.3784277391 | -3.2403845954 |
| BrCu:PH3 | CCSD(T)/AVTZ ENERGY=-4554.92133055 |               |               |               |
|          | Br                                 | -0.0000000000 | 0.0000000000  | -1.6491378038 |
|          | Cu                                 | -0.0000000000 | 0.0000000000  | 0.5708473286  |
|          | P                                  | 0.0000000000  | 0.0000000000  | 2.7484465065  |
|          | H                                  | 1.2326453019  | 0.0000000000  | 3.4287491530  |
|          | H                                  | -0.6163226509 | 1.0675021453  | 3.4287491530  |
|          | H                                  | -0.6163226509 | -1.0675021453 | 3.4287491530  |
| BrCu:SH2 | CCSD(T)/AVTZ ENERGY=-4611.15594868 |               |               |               |
|          | Cu                                 | 0.0000000000  | 0.0108611295  | -0.5715423659 |
|          | Br                                 | 0.0000000000  | -0.0055307095 | 1.6433539316  |
|          | S                                  | 0.0000000000  | 0.0455346736  | -2.7726659457 |
|          | H                                  | 0.9755899011  | -0.8473208483 | -3.0258007167 |
|          | H                                  | -0.9755899011 | -0.8473208483 | -3.0258007167 |

### Complexes B...AgBr.

|           |                                               |              |              |               |
|-----------|-----------------------------------------------|--------------|--------------|---------------|
| BrAg      | CCSD(T)/AVTZ,AG=AVTZ-PP ENERGY=-2719.16426877 |              |              |               |
|           | Br                                            | 0.0000000000 | 0.0000000000 | -1.3864975177 |
|           | Ag                                            | 0.0000000000 | 0.0000000000 | 1.0270561449  |
| BrAg:CO   | CCSD(T)/AVTZ,AG=AVTZ-PP ENERGY=-2832.36371533 |              |              |               |
|           | Br                                            | 0.0000000000 | 0.0000000000 | -1.8505728385 |
|           | Ag                                            | 0.0000000000 | 0.0000000000 | 0.5354952640  |
|           | C                                             | 0.0000000000 | 0.0000000000 | 2.5710431875  |
|           | O                                             | 0.0000000000 | 0.0000000000 | 3.7016676956  |
| BrAg:C2H4 | CCSD(T)/AVTZ,AG=AVTZ-PP ENERGY=-2797.64853785 |              |              |               |
|           | Br                                            | 0.0000000000 | 0.0000000000 | -1.7979634531 |
|           | Ag                                            | 0.0000000000 | 0.0000000000 | 0.6031326335  |
|           | C                                             | 0.0000000000 | 0.6813326807 | 2.7923355997  |

|           |                                               |               |               |               |
|-----------|-----------------------------------------------|---------------|---------------|---------------|
|           | C                                             | 0.0000000000  | -0.6813326807 | 2.7923355997  |
|           | H                                             | -0.9257331566 | 1.2419805603  | 2.8593354884  |
|           | H                                             | 0.9257331566  | 1.2419805603  | 2.8593354884  |
|           | H                                             | 0.9257331566  | -1.2419805603 | 2.8593354884  |
|           | H                                             | -0.9257331566 | -1.2419805603 | 2.8593354884  |
| BrAg:C2H2 | CCSD(T)/AVTZ,AG=AVTZ-PP ENERGY=-2796.39140181 |               |               |               |
|           | Br                                            | 0.0000000000  | 0.0000000000  | -1.7732052050 |
|           | Ag                                            | 0.0000000000  | 0.0000000000  | 0.6262950368  |
|           | C                                             | 0.0000000000  | 0.6118759370  | 2.8363802621  |
|           | C                                             | 0.0000000000  | -0.6118759370 | 2.8363802621  |
|           | H                                             | 0.0000000000  | 1.6713083212  | 2.9730657341  |
|           | H                                             | 0.0000000000  | -1.6713083212 | 2.9730657341  |
| BrAg:N2   | CCSD(T)/AVTZ,AG=AVTZ-PP ENERGY=-2828.56344616 |               |               |               |
|           | Br                                            | 0.0000000000  | 0.0000000000  | -1.8571704359 |
|           | Ag                                            | 0.0000000000  | 0.0000000000  | 0.5315923377  |
|           | N                                             | 0.0000000000  | 0.0000000000  | 2.6990027314  |
|           | N                                             | 0.0000000000  | 0.0000000000  | 3.8017032098  |
| BrAg:NCH  | CCSD(T)/AVTZ,AG=AVTZ-PP ENERGY=-2812.48269116 |               |               |               |
|           | Br                                            | 0.0000000000  | 0.0000000000  | -1.8443445676 |
|           | Ag                                            | 0.0000000000  | 0.0000000000  | 0.5489622258  |
|           | N                                             | 0.0000000000  | 0.0000000000  | 2.6662740475  |
|           | C                                             | 0.0000000000  | 0.0000000000  | 3.8199172940  |
|           | H                                             | 0.0000000000  | 0.0000000000  | 4.8893920745  |
| BrAg:NH3  | CCSD(T)/AVTZ,AG=AVTZ-PP ENERGY=-2775.69328225 |               |               |               |
|           | Br                                            | -0.0000000000 | 0.0000000000  | -1.6465262742 |
|           | Ag                                            | -0.0000000000 | 0.0000000000  | 0.7489120597  |
|           | N                                             | 0.0000000000  | 0.0000000000  | 2.9147778540  |
|           | H                                             | 0.9428031512  | 0.0000000000  | 3.2918032831  |
|           | H                                             | -0.4714015756 | 0.8164914797  | 3.2918032831  |
|           | H                                             | -0.4714015756 | -0.8164914797 | 3.2918032831  |
| BrAg:OH2  | CCSD(T)/AVTZ,AG=AVTZ-PP ENERGY=-2795.53536915 |               |               |               |
|           | Ag                                            | 0.0000000000  | 0.0137192602  | -0.7311711113 |
|           | Br                                            | 0.0000000000  | -0.0098233504 | 1.6635776900  |
|           | O                                             | 0.0000000000  | 0.0059606770  | -2.9530700350 |
|           | H                                             | 0.7676072738  | -0.3920442558 | -3.3777066869 |
|           | H                                             | -0.7676072738 | -0.3920442558 | -3.3777066869 |
| BrAg:PH3  | CCSD(T)/AVTZ,AG=AVTZ-PP ENERGY=-3061.90811305 |               |               |               |
|           | Br                                            | -0.0000000000 | 0.0000000000  | -1.9073815111 |
|           | Ag                                            | -0.0000000000 | 0.0000000000  | 0.4979218927  |
|           | P                                             | 0.0000000000  | 0.0000000000  | 2.8425866373  |
|           | H                                             | 1.2319861812  | 0.0000000000  | 3.5226560022  |
|           | H                                             | -0.6159930906 | 1.0669313301  | 3.5226560022  |
|           | H                                             | -0.6159930906 | -1.0669313301 | 3.5226560022  |
| BrAg:SH2  | CCSD(T)/AVTZ,AG=AVTZ-PP ENERGY=-3118.14194803 |               |               |               |
|           | Ag                                            | 0.0000000000  | 0.0118418645  | -0.4919975500 |
|           | Br                                            | 0.0000000000  | -0.0089924756 | 1.9099206755  |
|           | S                                             | 0.0000000000  | 0.0369962624  | -2.9083790115 |
|           | H                                             | 0.9739820787  | -0.8655902197 | -3.1235889148 |
|           | H                                             | -0.9739820787 | -0.8655902197 | -3.1235889148 |

### Complexes B...AuBr.

|           |                                                                                                                                                                                                                                                                                                                                                                                                                       |
|-----------|-----------------------------------------------------------------------------------------------------------------------------------------------------------------------------------------------------------------------------------------------------------------------------------------------------------------------------------------------------------------------------------------------------------------------|
| BrAu      | CCSD(T)/AVTZ,AU=AVTZ-PP ENERGY=-2707.86345084<br>Br 0.0000000000 0.0000000000 -1.6694614349<br>Au 0.0000000000 0.0000000000 0.6772555054                                                                                                                                                                                                                                                                              |
| BrAu:CO   | CCSD(T)/AVTZ,AU=AVTZ-PP ENERGY=-2821.09823672<br>Br 0.0000000000 0.0000000000 -1.9748259165<br>Au 0.0000000000 0.0000000000 0.3830081780<br>C 0.0000000000 0.0000000000 2.2917188974<br>O 0.0000000000 0.0000000000 3.4270581431                                                                                                                                                                                      |
| BrAu:C2H4 | CCSD(T)/AVTZ,AU=AVTZ-PP ENERGY=-2786.37555718<br>Br 0.0000000000 0.0000000000 -1.9420728619<br>Au 0.0000000000 0.0000000000 0.4305638059<br>C 0.0000000000 0.6933485633 2.4900276961<br>C 0.0000000000 -0.6933485633 2.4900276961<br>H -0.9229722175 1.2471999826 2.6185335373<br>H 0.9229722175 1.2471999826 2.6185335373<br>H 0.9229722175 -1.2471999826 2.6185335373<br>H -0.9229722175 -1.2471999826 2.6185335373 |
| BrAu:C2H2 | CCSD(T)/AVTZ,AU=AVTZ-PP ENERGY=-2785.11579837<br>Br 0.0000000000 0.0000000000 -1.9216226022<br>Au 0.0000000000 0.0000000000 0.4456776837<br>C 0.0000000000 0.6206224493 2.5042103026<br>C 0.0000000000 -0.6206224493 2.5042103026<br>H 0.0000000000 1.6540848244 2.7807305103<br>H 0.0000000000 -1.6540848244 2.7807305103                                                                                            |
| BrAu:N2   | CCSD(T)/AVTZ,AU=AVTZ-PP ENERGY=-2817.27971921<br>Br 0.0000000000 0.0000000000 -1.9625320053<br>Au 0.0000000000 0.0000000000 0.3776700766<br>N 0.0000000000 0.0000000000 2.3899610432<br>N 0.0000000000 0.0000000000 3.4947801309                                                                                                                                                                                      |
| BrAu:NCH  | CCSD(T)/AVTZ,AU=AVTZ-PP ENERGY=-2801.20109575<br>Br 0.0000000000 0.0000000000 -1.9625180333<br>Au 0.0000000000 0.0000000000 0.3864863684<br>N 0.0000000000 0.0000000000 2.3903364679<br>C 0.0000000000 0.0000000000 3.5432996145<br>H 0.0000000000 0.0000000000 4.6122548699                                                                                                                                          |
| BrAu:NH3  | CCSD(T)/AVTZ,AU=AVTZ-PP ENERGY=-2764.41393691<br>Br -0.0000000000 0.0000000000 -1.8408881319<br>Au -0.0000000000 0.0000000000 0.5157767448<br>N 0.0000000000 0.0000000000 2.6066397219<br>H 0.9471305363 0.0000000000 2.9741070909<br>H -0.4735652682 0.8202391052 2.9741070909<br>H -0.4735652682 -0.8202391052 2.9741070909                                                                                         |
| BrAu:OH2  | CCSD(T)/AVTZ,AU=AVTZ-PP ENERGY=-2784.24592346<br>Au 0.0000000000 0.0049717947 -0.5001942354<br>Br 0.0000000000 -0.0067273264 1.8396926514<br>O 0.0000000000 0.0275534736 -2.6519400876                                                                                                                                                                                                                                |

|          |    |               |               |               |
|----------|----|---------------|---------------|---------------|
|          | H  | 0.7704806011  | -0.4378116538 | -3.0001009586 |
|          | H  | -0.7704806011 | -0.4378116538 | -3.0001009586 |
| BrAu:PH3 | Br | -0.0000000000 | 0.0000000000  | -2.0225216899 |
|          | Au | -0.0000000000 | 0.0000000000  | 0.3621017613  |
|          | P  | 0.0000000000  | 0.0000000000  | 2.5967855460  |
|          | H  | 1.2402237858  | 0.0000000000  | 3.2586080775  |
|          | H  | -0.6201118929 | 1.0740653049  | 3.2586080775  |
|          | H  | -0.6201118929 | -1.0740653049 | 3.2586080775  |
| BrAu:SH2 | Au | 0.0000000000  | 0.0016589841  | -0.3545937355 |
|          | Br | 0.0000000000  | -0.0032971575 | 2.0138928375  |
|          | S  | 0.0000000000  | 0.0505538692  | -2.6559098679 |
|          | H  | 0.9746269039  | -0.8353995607 | -2.9399249530 |
|          | H  | -0.9746269039 | -0.8353995607 | -2.9399249530 |

## Complexes B...CuI.

|          |                                                                                                                                                                                                                                                                                                                                                                                                                     |
|----------|---------------------------------------------------------------------------------------------------------------------------------------------------------------------------------------------------------------------------------------------------------------------------------------------------------------------------------------------------------------------------------------------------------------------|
| ICu      | CCSD(T)/AVTZ,I=AVTZ-PP ENERGY=-1934.34695594<br>Cu 0.0000000000 0.0000000000 -1.5868187324<br>I 0.0000000000 0.0000000000 0.7945759847                                                                                                                                                                                                                                                                              |
| ICu:CO   | CCSD(T)/AVTZ,I=AVTZ-PP ENERGY=-2047.55920007<br>I 0.0000000000 0.0000000000 -1.3185247697<br>Cu 0.0000000000 0.0000000000 1.0669025646<br>C 0.0000000000 0.0000000000 2.9059252858<br>O 0.0000000000 0.0000000000 4.0393673720                                                                                                                                                                                      |
| ICu:C2H4 | CCSD(T)/AVTZ,I=AVTZ-PP ENERGY=-2012.84014658<br>I 0.0000000000 0.0000000000 -1.2573353450<br>Cu 0.0000000000 0.0000000000 1.1378437219<br>C 0.0000000000 0.6843506778 3.0989563763<br>C 0.0000000000 -0.6843506778 3.0989563763<br>H -0.9252346922 1.2453745008 3.1782888026<br>H 0.9252346922 1.2453745008 3.1782888026<br>H 0.9252346922 -1.2453745008 3.1782888026<br>H -0.9252346922 -1.2453745008 3.1782888026 |
| ICu:C2H2 | CCSD(T)/AVTZ,I=AVTZ-PP ENERGY=-2011.58504562<br>I 0.0000000000 0.0000000000 -1.2266759883<br>Cu 0.0000000000 0.0000000000 1.1681307274<br>C 0.0000000000 0.6152168040 3.1127706032<br>C 0.0000000000 -0.6152168040 3.1127706032<br>H 0.0000000000 1.6669912952 3.3071394751<br>H 0.0000000000 -1.6669912952 3.3071394751                                                                                            |
| ICu:N2   | CCSD(T)/AVTZ,I=AVTZ-PP ENERGY=-2043.75731062<br>I 0.0000000000 0.0000000000 -1.3087758973<br>Cu 0.0000000000 0.0000000000 1.0683419341<br>N 0.0000000000 0.0000000000 2.9532977929<br>N 0.0000000000 0.0000000000 4.0577663561                                                                                                                                                                                      |
| ICu:NCH  | CCSD(T)/AVTZ,I=AVTZ-PP ENERGY=-2027.67827436<br>I 0.0000000000 0.0000000000 -1.3004943286<br>Cu 0.0000000000 0.0000000000 1.0851175169<br>N 0.0000000000 0.0000000000 2.9594457774<br>C 0.0000000000 0.0000000000 4.1136298571<br>H 0.0000000000 0.0000000000 5.1828460590                                                                                                                                          |
| ICu:NH3  | I -0.0000000000 0.0000000000 -1.0925476437<br>Cu -0.0000000000 0.0000000000 1.2936156791<br>N 0.0000000000 0.0000000000 3.2468574276<br>H 0.9426728110 0.0000000000 3.6273111070<br>H -0.4713364055 0.8163786018 3.6273111070<br>H -0.4713364055 -0.8163786018 3.6273111070                                                                                                                                         |
| ICu:OH2  | CCSD(T)/AVTZ,I=AVTZ-PP ENERGY=-2010.72832177<br>I 2.0862992464 0.0169157243 0.0000000000<br>Cu -0.2905270795 -0.0386843833 0.0000000000<br>O -2.2564350913 -0.0520917210 0.0000000000<br>H -2.6838769117 0.3389375008 0.7701737714<br>H -2.6838769117 0.3389375008 -0.7701737714                                                                                                                                    |
| ICu:PH3  | CCSD(T)/AVTZ,I=AVTZ-PP ENERGY=-2277.09631571                                                                                                                                                                                                                                                                                                                                                                        |

|         |                                              |               |               |               |
|---------|----------------------------------------------|---------------|---------------|---------------|
|         | I                                            | -0.0000000000 | 0.0000000000  | -1.3833495081 |
|         | Cu                                           | -0.0000000000 | 0.0000000000  | 1.0148278046  |
|         | P                                            | 0.0000000000  | 0.0000000000  | 3.2063142897  |
|         | H                                            | 1.2323913585  | 0.0000000000  | 3.8873562908  |
|         | H                                            | -0.6161956793 | 1.0672822239  | 3.8873562908  |
|         | H                                            | -0.6161956793 | -1.0672822239 | 3.8873562908  |
| ICu:SH2 | CCSD(T)/AVTZ,I=AVTZ-PP ENERGY=-2333.33141805 |               |               |               |
|         | I                                            | 2.4193846659  | 0.0103885070  | 0.0000000000  |
|         | Cu                                           | 0.0282953421  | -0.0383867815 | 0.0000000000  |
|         | S                                            | -2.1894075167 | -0.0945102993 | 0.0000000000  |
|         | H                                            | -2.4430487739 | 0.7980554554  | 0.9755334219  |
|         | H                                            | -2.4430487739 | 0.7980554554  | -0.9755334219 |

### Complexes B...AgI.

|          |                                                        |               |               |               |
|----------|--------------------------------------------------------|---------------|---------------|---------------|
| IAg      | CCSD(T)/AVTZ,AG=AVTZ-PP,I=AVTZ-PP ENERGY=-441.34642131 |               |               |               |
|          | I                                                      | 0.0000000000  | 0.0000000000  | -1.1802783951 |
|          | Ag                                                     | 0.0000000000  | 0.0000000000  | 1.3885807109  |
| IAg:CO   | CCSD(T)/AVTZ,AG=AVTZ-PP,I=AVTZ-PP ENERGY=-554.54243863 |               |               |               |
|          | I                                                      | 0.0000000000  | 0.0000000000  | -1.6073211588 |
|          | Ag                                                     | 0.0000000000  | 0.0000000000  | 0.9434510621  |
|          | C                                                      | 0.0000000000  | 0.0000000000  | 3.0032311797  |
|          | O                                                      | 0.0000000000  | 0.0000000000  | 4.1337523301  |
| IAg:C2H4 | CCSD(T)/AVTZ,AG=AVTZ-PP,I=AVTZ-PP ENERGY=-519.82791373 |               |               |               |
|          | I                                                      | 0.0000000000  | 0.0000000000  | -1.5623438247 |
|          | Ag                                                     | 0.0000000000  | 0.0000000000  | 1.0003217928  |
|          | C                                                      | 0.0000000000  | 0.6806279024  | 3.2123450960  |
|          | C                                                      | 0.0000000000  | -0.6806279024 | 3.2123450960  |
|          | H                                                      | -0.9258650110 | 1.2417979558  | 3.2740051247  |
|          | H                                                      | 0.9258650110  | 1.2417979558  | 3.2740051247  |
|          | H                                                      | 0.9258650110  | -1.2417979558 | 3.2740051247  |
|          | H                                                      | -0.9258650110 | -1.2417979558 | 3.2740051247  |
| IAg:C2H2 | CCSD(T)/AVTZ,AG=AVTZ-PP,I=AVTZ-PP ENERGY=-518.57103898 |               |               |               |
|          | I                                                      | 0.0000000000  | 0.0000000000  | -1.5387023758 |
|          | Ag                                                     | 0.0000000000  | 0.0000000000  | 1.0213062922  |
|          | C                                                      | 0.0000000000  | 0.6112870867  | 3.2587761341  |
|          | C                                                      | 0.0000000000  | -0.6112870867 | 3.2587761341  |
|          | H                                                      | 0.0000000000  | 1.6722151762  | 3.3835589434  |
|          | H                                                      | 0.0000000000  | -1.6722151762 | 3.3835589434  |
| IAg:N2   | CCSD(T)/AVTZ,AG=AVTZ-PP,I=AVTZ-PP ENERGY=-550.74368289 |               |               |               |
|          | I                                                      | 0.0000000000  | 0.0000000000  | -1.6114931617 |
|          | Ag                                                     | 0.0000000000  | 0.0000000000  | 0.9373815370  |
|          | N                                                      | 0.0000000000  | 0.0000000000  | 3.1395161949  |
|          | N                                                      | 0.0000000000  | 0.0000000000  | 4.2422029233  |
| IAg:NCH  | CCSD(T)/AVTZ,AG=AVTZ-PP,I=AVTZ-PP ENERGY=-534.66254434 |               |               |               |
|          | I                                                      | 0.0000000000  | 0.0000000000  | -1.5983164891 |
|          | Ag                                                     | 0.0000000000  | 0.0000000000  | 0.9556685390  |
|          | N                                                      | 0.0000000000  | 0.0000000000  | 3.0951676759  |
|          | C                                                      | 0.0000000000  | 0.0000000000  | 4.2490138527  |



|         |                                                        |               |               |               |
|---------|--------------------------------------------------------|---------------|---------------|---------------|
|         | H                                                      | 0.0000000000  | 0.0000000000  | 5.3185286874  |
| IAg:NH3 | CCSD(T)/AVTZ,AG=AVTZ-PP,I=AVTZ-PP ENERGY=-497.87310080 |               |               |               |
|         | I                                                      | -0.0000000000 | 0.0000000000  | -1.4195657930 |
|         | Ag                                                     | -0.0000000000 | 0.0000000000  | 1.1356763536  |
|         | N                                                      | 0.0000000000  | 0.0000000000  | 3.3179727095  |
|         | H                                                      | 0.9428048303  | 0.0000000000  | 3.6951116117  |
|         | H                                                      | -0.4714024151 | 0.8164929338  | 3.6951116117  |
| IAg:OH2 | CCSD(T)/AVTZ,AG=AVTZ-PP,I=AVTZ-PP ENERGY=-517.71610640 |               |               |               |
|         | Ag                                                     | 0.0000000000  | 0.0169200939  | -1.1183894635 |
|         | I                                                      | 0.0000000000  | -0.0072896315 | 1.4340346710  |
|         | O                                                      | 0.0000000000  | -0.0053830031 | -3.3578171454 |
|         | H                                                      | 0.7674478872  | -0.4037550164 | -3.7824798973 |
|         | H                                                      | -0.7674478872 | -0.4037550164 | -3.7824798973 |
| IAg:PH3 | CCSD(T)/AVTZ,AG=AVTZ-PP,I=AVTZ-PP ENERGY=-784.08705700 |               |               |               |
|         | I                                                      | -0.0000000000 | 0.0000000000  | -1.6624918403 |
|         | Ag                                                     | -0.0000000000 | 0.0000000000  | 0.9057550066  |
|         | P                                                      | 0.0000000000  | 0.0000000000  | 3.2713277806  |
|         | H                                                      | 1.2317451485  | 0.0000000000  | 3.9525197382  |
|         | H                                                      | -0.6158725743 | 1.0667225896  | 3.9525197382  |
| IAg:SH2 | CCSD(T)/AVTZ,AG=AVTZ-PP,I=AVTZ-PP ENERGY=-840.32170084 |               |               |               |
|         | Ag                                                     | 0.0000000000  | 0.0152355996  | -0.8988214182 |
|         | I                                                      | 0.0000000000  | -0.0068816039 | 1.6636927521  |
|         | S                                                      | 0.0000000000  | 0.0309510603  | -3.3386315214 |
|         | H                                                      | 0.9739172326  | -0.8742658261 | -3.5422838144 |
|         | H                                                      | -0.9739172326 | -0.8742658261 | -3.5422838144 |

### Complexes B···AuI.

|          |                                                        |               |               |               |
|----------|--------------------------------------------------------|---------------|---------------|---------------|
| IAu      | CCSD(T)/AVTZ,AU=AVTZ-PP,I=AVTZ-PP ENERGY=-430.05063662 |               |               |               |
|          | I                                                      | 0.0000000000  | 0.0000000000  | -1.5225753616 |
|          | Au                                                     | 0.0000000000  | 0.0000000000  | 0.9809944092  |
| IAu:CO   | CCSD(T)/AVTZ,AU=AVTZ-PP,I=AVTZ-PP ENERGY=-543.27629118 |               |               |               |
|          | I                                                      | 0.0000000000  | 0.0000000000  | -1.8207294732 |
|          | Au                                                     | 0.0000000000  | 0.0000000000  | 0.7064122588  |
|          | C                                                      | 0.0000000000  | 0.0000000000  | 2.6332947552  |
| IAu:C2H4 | CCSD(T)/AVTZ,AU=AVTZ-PP,I=AVTZ-PP ENERGY=-508.55515309 |               |               |               |
|          | I                                                      | 0.0000000000  | 0.0000000000  | -1.7895270861 |
|          | Au                                                     | 0.0000000000  | 0.0000000000  | 0.7476093388  |
|          | C                                                      | 0.0000000000  | 0.6921330558  | 2.8288813416  |
|          | C                                                      | 0.0000000000  | -0.6921330558 | 2.8288813416  |
|          | H                                                      | -0.9236229311 | 1.2466795693  | 2.9493988375  |
|          | H                                                      | 0.9236229311  | 1.2466795693  | 2.9493988375  |
|          | H                                                      | 0.9236229311  | -1.2466795693 | 2.9493988375  |
| IAu:C2H2 | CCSD(T)/AVTZ,AU=AVTZ-PP,I=AVTZ-PP ENERGY=-507.29554811 |               |               |               |
|          | I                                                      | 0.0000000000  | 0.0000000000  | -1.7697480811 |

|         |                                                        |               |               |               |
|---------|--------------------------------------------------------|---------------|---------------|---------------|
|         | Au                                                     | 0.000000000   | 0.000000000   | 0.7616280478  |
|         | C                                                      | 0.000000000   | 0.6195416337  | 2.8440345486  |
|         | C                                                      | 0.000000000   | -0.6195416337 | 2.8440345486  |
|         | H                                                      | 0.000000000   | 1.6572001904  | 3.1033490743  |
|         | H                                                      | 0.000000000   | -1.6572001904 | 3.1033490743  |
| IAu:N2  | CCSD(T)/AVTZ,AU=AVTZ-PP,I=AVTZ-PP ENERGY=-539.46029395 |               |               |               |
|         | I                                                      | 0.000000000   | 0.000000000   | -1.8085189872 |
|         | Au                                                     | 0.000000000   | 0.000000000   | 0.6961141733  |
|         | N                                                      | 0.000000000   | 0.000000000   | 2.7461324363  |
|         | N                                                      | 0.000000000   | 0.000000000   | 3.8506857408  |
| IAu:NCH | CCSD(T)/AVTZ,AU=AVTZ-PP,I=AVTZ-PP ENERGY=-523.38112761 |               |               |               |
|         | I                                                      | 0.000000000   | 0.000000000   | -1.8061415634 |
|         | Au                                                     | 0.000000000   | 0.000000000   | 0.7063512009  |
|         | N                                                      | 0.000000000   | 0.000000000   | 2.7377838410  |
|         | C                                                      | 0.000000000   | 0.000000000   | 3.8910084575  |
|         | H                                                      | 0.000000000   | 0.000000000   | 4.9599919109  |
| IAu:NH3 | CCSD(T)/AVTZ,AU=AVTZ-PP,I=AVTZ-PP ENERGY=-486.59422339 |               |               |               |
|         | I                                                      | -0.000000000  | 0.000000000   | -1.6898363093 |
|         | Au                                                     | -0.000000000  | 0.000000000   | 0.8287338947  |
|         | N                                                      | 0.000000000   | 0.000000000   | 2.9421227360  |
|         | H                                                      | 0.9470068148  | 0.000000000   | 3.3094256868  |
|         | H                                                      | -0.4735034074 | 0.8201319592  | 3.3094256868  |
|         | H                                                      | -0.4735034074 | -0.8201319592 | 3.3094256868  |
| IAu:OH2 | CCSD(T)/AVTZ,AU=AVTZ-PP,I=AVTZ-PP ENERGY=-506.42811781 |               |               |               |
|         | Au                                                     | 0.000000000   | 0.0062954810  | -0.8109525685 |
|         | I                                                      | 0.000000000   | -0.0050818197 | 1.6891815229  |
|         | O                                                      | 0.000000000   | 0.0192128775  | -2.9938980145 |
|         | H                                                      | 0.7698678860  | -0.4476868674 | -3.3410698399 |
|         | H                                                      | -0.7698678860 | -0.4476868674 | -3.3410698399 |
| IAu:PH3 | CCSD(T)/AVTZ,AU=AVTZ-PP,I=AVTZ-PP ENERGY=-772.81970815 |               |               |               |
|         | I                                                      | -0.000000000  | 0.000000000   | -1.8652784417 |
|         | Au                                                     | -0.000000000  | 0.000000000   | 0.6846115098  |
|         | P                                                      | 0.000000000   | 0.000000000   | 2.9372862291  |
|         | H                                                      | 1.2394467345  | 0.000000000   | 3.6012643313  |
|         | H                                                      | -0.6197233672 | 1.0733923587  | 3.6012643313  |
|         | H                                                      | -0.6197233672 | -1.0733923587 | 3.6012643313  |
| IAu:SH2 | CCSD(T)/AVTZ,AU=AVTZ-PP,I=AVTZ-PP ENERGY=-829.04422952 |               |               |               |
|         | Au                                                     | 0.000000000   | 0.0025459784  | -0.6741565548 |
|         | I                                                      | 0.000000000   | -0.0026398490 | 1.8566099921  |
|         | S                                                      | 0.000000000   | 0.0477273655  | -3.0015518021 |
|         | H                                                      | 0.9746767937  | -0.8416179053 | -3.2729258972 |
|         | H                                                      | -0.9746767937 | -0.8416179053 | -3.2729258972 |
